# Supplementary material
Source: ML conference proceedings conference paper supplement (https://openaccess.thecvf.com/content/ICCV2023/html/Sandstrom_Point-SLAM_Dense_Neural_ICCV_2023_paper.html)
Supplement: Supplementary file 2 [file Sandstrom_Point-SLAM_Dense_Neural_ICCV_2023_supplemental.zip]

Archive with 2 entries (2 files):
- 01873-supp.pdf
- point_slam_intro.mp4
